# Supplementary material for: Mono-Parasitic and Poly-Parasitic Intestinal Infections among Children Aged 36–45 Months in East Nusa Tenggara, Indonesia
Source: MDPI journal article supplement (doi:10.3390/tropicalmed8010045), 2023-01-06
Supplement: s1 [file s1]

## Supplementary Materials

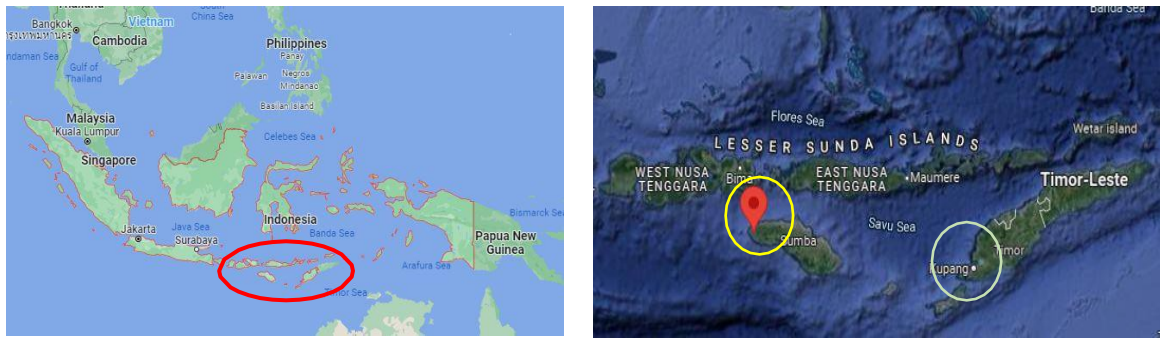

**Figure S1.** Location of North Kodi (yellow circle) and Kupang (green circle) in East Nusa Tenggara (red circle), Indonesia, taken from Google Earth©

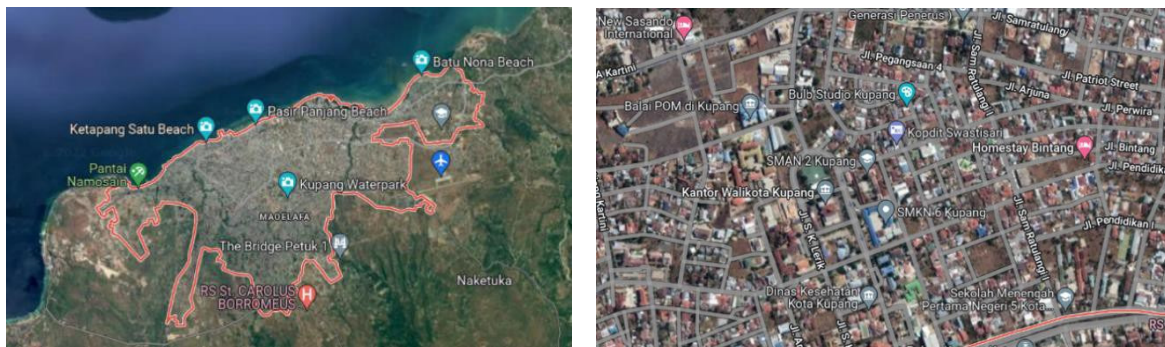

**Figure S2.** Kupang, East Nusa Tenggara, Indonesia, taken from Google Earth©

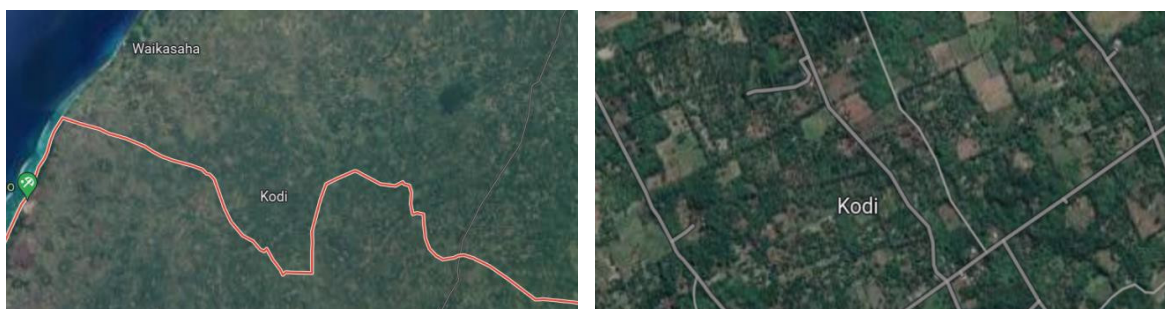

**Figure S3.** North Kodi District, East Nusa Tenggara, Indonesia, taken from Google Earth©

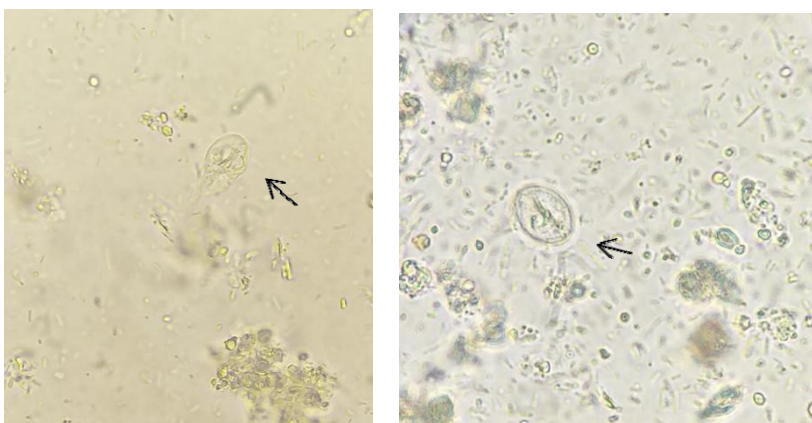

**Figure S4.** Direct smear of *Giardia lamblia*. *Giardia lamblia* cyst (left), *Giardia lamblia* trophozoite (right)

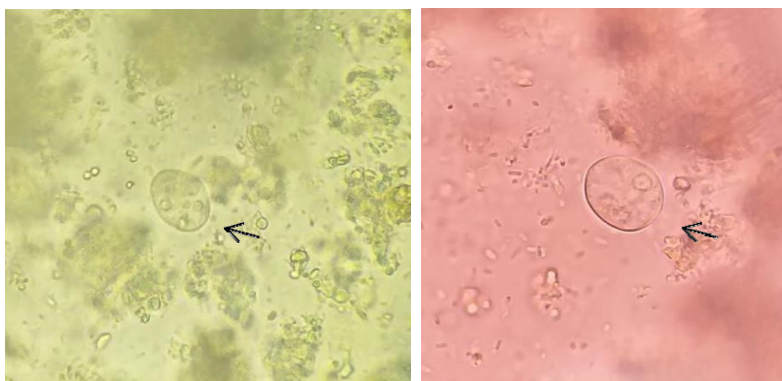

**Figure S5.** Direct smear of *Entamoeba Coli*. *Entamoeba coli* cyst (left), *Entamoeba coli* trophozoite (right)

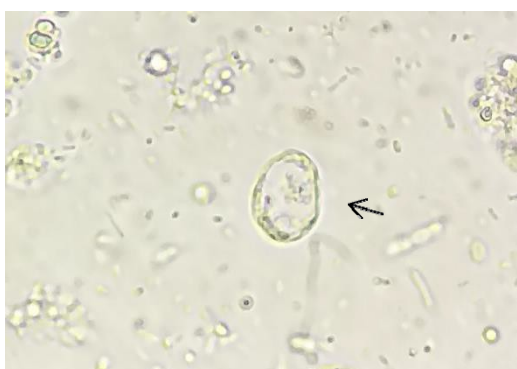

**Figure S6.** Direct smear of a *Blastocystis sp.* vacuole
